# Supplementary material for: A Novel Interplay between Rap1 and PKA Regulates Induction of Angiogenesis in Prostate Cancer
Source: PubMed Central journal article supplement (PMC3499522; doi:10.1371/journal.pone.0049893), 2012-11-15

Figure S8

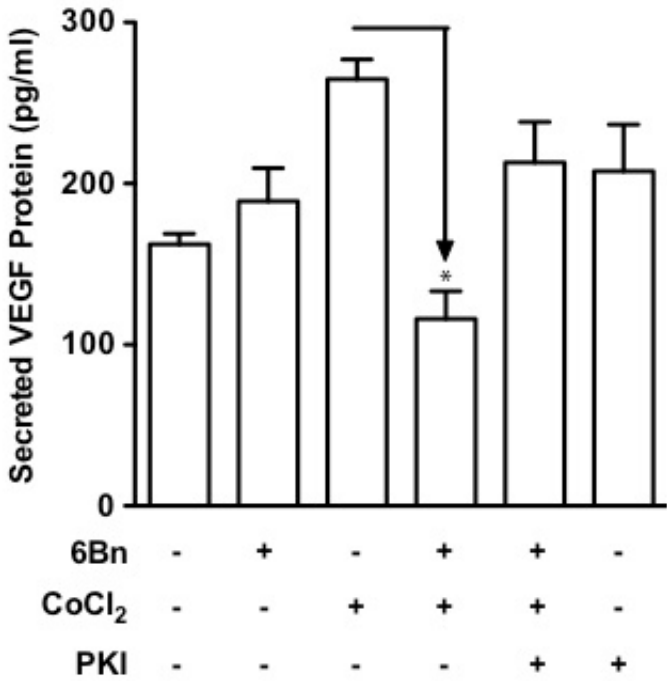

Supplement: pone.0049893.s008.pdf [file pone.0049893.s008.pdf]
